# Supplementary material for: Fluorine-free polysiloxane-based single-ion-conducting polymer electrolyte for lithium–metal batteries
Source: Royal Society of Chemistry journal article supplement (doi:10.1039/d5gc00252d), 2025-01-01
Supplement: d5gc00252d1.xlsx [file d5gc00252d1.xlsx]

## Sheet: For Manuscript Final
Sub-process			Synthesis of (4 styrene)sulfonylchloride						Synthesis of LiSDM ionic side-chain						Synthesis of the single-ion conducting polymer electrolyte (SIPE)					SIPE membrane preparation
Precursors			Sodium p-styrenesulfonate	N,N-dimethylformamid (DMF)	Thionylchloride	Tert-Butylcatechol	Deionized water	Dichloromethane	Acetonitrile	Malononitrile	Triethylamine	Lithiumhydroxide monohydrate	Dichloromethane	Deionized water	poly(mercaptopropyl)methylsiloxane]	Tetrahydrofurane	Azobisisobutyronitrile	Acetone	Dichloromethane	polyacrylonitrile (PAN, 150'000)	N,N-dimethylformamid (DMF)	Propylene carbonate (PC)
Reach registered			Y	Y	Y	Y		Y	Y	Y	Y	Y	Y		Y	Y	Y	Y	Y	N	Y	Y
Physical hazards	Explosives
	Flammable	Gas
		Aerosol
		Liquid		H226					H225 (√)		H225 (√)					H225(√)		H225(√), H226			H226
		Solid
	Oxidizing gas
	Gas under pressure
	Self-reactive substances and mixtures/Organic peroxides			H242													H242(√)				H242
	Pyrophoric	Liquid
		Solid
	Self-heating substances and mixtures
	Substances and mixtures which in contact with water emit flammable gases
	Oxidizing	Liquid
		Solid
	Corrosive to metals
Health hazards	Acute toxicity	Oral	H302	H302	H301, H302(√)	H302		H302	H301, H302(√)	H300, H301(√)	H301(√), H302	H301, H302	H302			H302	H301, H302(√)		H302		H302
		Dermal		H312 (√)		H311, H312			H311, H312(√)	H311(√)	H311(√). H312	H311									H312 (√)
		Inhalation		H331, H332(√)	H330,H331, H332(√)				H331, H332(√)	H331(√)	H331(√), H332					H332	H332(√)				H331, H332(√)
	Skin corrosion/ irritation		H315	H314,H315	H314 (√)	H314		H315	H314	H315	H314(√)	H314	H315			H315			H315		H314,H315	H315
	Serious eyes damage/eye irritation		H318,H319	H319 (√)	H318	H318		H319	H319(√)	H319	H318(√)	H318	H319			H318, H319(√)		H319(√)	H319		H319 (√)	H319 (√)
	Respiratory or skin sensitization			H317		H317			H317	H317											H317
	Germ cell mutagenicity							H341					H341						H341
	Carcinogenity							H350, H351 (√)	H350				H350, H351 (√)			H351(√)			H350, H351 (√)
	Reproductive toxicity			H360, H360D,H360Df																	H360, H360D,H360Df
	Specific target organ toxicity - single exposure		H335		H335			H370,H335,H336	H335, H336	H370, H335	H335, H336		H370,H335,H336			H370, H335(√), H336, H371		H335,H336(√), H371	H370,H335,H336
	Specific target organ toxicity - repeated exposure			H373				H373					H373						H373		H373
	Aspiration hazard
Env. Hazards	Hazardous to the aquatic environment	Acute		H400		H400				H400(√)											H400
		Chronic		H412		H410,H411			H411	H410(√)	H412						H410, H412(√)				H412
Danger
Warning
Danger/Warning
No hazard word
No Hazard Word/Danger
(√) EU harmonized risk
Not Assessed
