# Supplementary material for: Fluorine-free polysiloxane-based single-ion-conducting polymer electrolyte for lithium–metal batteries
Source: Royal Society of Chemistry journal article supplement (doi:10.1039/d5gc00252d), 2025-01-01
Supplement: d5gc00252d1.zip [file d5gc00252d1.zip]

## Sheet: For Manuscript final
Sub-process			Sulfochlorination of the starting material						Synthesis of Lithium 1-[3-(methacryloyloxy)-propylsulfonyl]-1-(trifluoromethylsulfonyl)imide (LiMTFSI)									Synthesis of the single-ion conducting polymer (PSiOM Ionomer)					PSiOM membrane fabrication
Precursors			3-Sulfopropyl methacrylate potassium salt	N,N, Dimethylformamide (DMF)	Tetrahydrofurane (THF)	Thionyl chloride	Deionized water	Dichloromethane	Trifluoromethanesulfonamide	4-t-butylcatechol	Tetrahydrofurane (THF)	Triethylamine	Ethylacetate	Deionized water	Lithiumhydride	Hexane	Dichloromethane	poly(mercaptopropyl)methylsiloxane]	Tetrahydrofurane	Azobisisobutyronitrile	Acetone	Dichloromethane	poly(vinylidene fluoride-co-hexafluoropropylene) (PVdF-HFP)	Acetone	Dimethylsulfoxide	Ethylene carbonate	Diethyl carbonate	Fluoroethylene carbonate
Reach registered			Y	Y	Y	Y		Y	Y	Y	Y	Y	Y		Y	Y	Y	N	Y	Y	Y	Y	N	Y	Y	Y	Y	Y
Physical hazards	Explosives
	Flammable	Gas
		Aerosol
		Liquid		H226	H225(√)						H225(√)	H225 (√)	H225(√)			H225(√)			H225(√)		H225(√), H226			H225(√), H226			H226
		Solid
	Oxidizing gas
	Gas under pressure
	Self-reactive substances and mixtures/Organic peroxides			H242																H242
	Pyrophoric	Liquid
		Solid
	Self-heating substances and mixtures
	Substances and mixtures which in contact with water emit flammable gases														H260, H261
	Oxidizing	Liquid
		Solid
	Corrosive to metals
Health hazards	Acute toxicity	Oral		H302	H302	H301, H302(√)		H302	H301, H302	H302	H302	H301(√), H302			H301		H302		H302	H301, H302(√)		H302				H302		H302
		Dermal		H312 (√)					H311	H311, H312		H311(√). H312
		Inhalation		H331, H332(√)	H332	H330,H331, H332(√)					H332	H331(√), H332				H331			H332	H332(√)
	Skin corrosion/ irritation		H315	H314,H315	H315	H314 (√)		H315	H315	H314	H315	H314(√)			H314	H315(√)	H315		H315			H315			H315	H315	H315	H315
	Serious eyes damage/eye irritation		H319	H319 (√)	H318, H319(√)	H318		H319	H318, H319	H318	H318, H319(√)	H318(√)	H319(√)		H318	H319	H319		H318, H319(√)		H319(√)	H319		H319(√)	H319	H318, H319	H319	H319
	Respiratory or skin sensitization		H317	H317						H317																		H317
	Germ cell mutagenicity							H341									H341					H341
	Carcinogenity				H351(√)			H350, H351 (√)			H351(√)						H350, H351 (√)		H351(√)			H350, H351 (√)
	Reproductive toxicity			H360, H360D,H360Df												H361, H361f
	Specific target organ toxicity - single exposure		H335		H370, H335(√), H336, H371	H335		H370,H335,H336	H335		H370, H335(√), H336, H371	H335, H336	H335, H336(√)		H371	H335, H336(√)	H370,H335,H336		H370, H335(√), H336, H371		H335,H336(√), H371	H370,H335,H336		H335,H336(√), H371		H335	H335
	Specific target organ toxicity - repeated exposure			H373				H373								H372, H373(√)	H373					H373				H373		H372
	Aspiration hazard															H304(√)
Env. Hazards	Hazardous to the aquatic environment	Acute		H400						H400
		Chronic		H412						H410, H411		H412	H410			H411 (√), H413				H410, H412(√)
Danger
Warning
Danger/Warning
No hazard word
No Hazard Word/Danger
(√) EU harmonized risk
Not Assessed
